# Supplementary material for: LayCO: Achieving Least Lossy Accuracy for Most Efficient RRAM-Based Deep Neural Network Accelerator via Layer-Centric Co-Optimization
Source: Springer Nature journal article supplement (doi:10.1007/s11390-023-2545-y), 2023-03-30
Supplement: 11390_2023_2545_MOESM1_ESM.pdf [file 11390_2023_2545_MOESM1_ESM.pdf]

Zhao SF, Wang F, Liu B *et al.* LayCO: Achieving least lossy accuracy for most efficient RRAM-based deep neural network accelerator via layer-centric co-optimization. JOURNAL OF COMPUTER SCIENCE AND TECHNOLOGY 38(2): 328–347 Mar. 2023. DOI: 10.1007/s11390-023-2545-y

# LayCO: Achieving Least Lossy Accuracy for Most Efficient RRAM-Based Deep Neural Network Accelerator via Layer-Centric Co-Optimization

Shao-Feng Zhao<sup>1;4</sup> (赵少锋), Student Member, CCF, Fang Wang<sup>1;2</sup> (王芳), Member, CCF, Bo Liu<sup>3</sup> (刘博), Dan Feng<sup>1;2</sup> (冯丹), Member, CCF, ACM, IEEE, and Yang Liu<sup>4</sup> (刘洋)

<sup>1</sup> Wuhan National Laboratory for Optoelectronics, Key Laboratory of Information Storage System, Engineering Research Center of data storage systems and Technology (School of Computer Science & Technology, Huazhong University of Science & Technology), Ministry of Education of China

<sup>2</sup> Research Institute of Huazhong University of science and technology in Shenzhen

<sup>3</sup> School of Computer and Artificial Intelligence, Network Management Center, Zhengzhou University

<sup>4</sup> Cloud Computing and Big Data Institute, Cyberspace Administration Center, Henan University of Economics and Law

# Research Context

- Resistive random access memory (RRAM)
  - enables to operate massively parallel dot products and accumulations
- RRAM-based accelerator
  - effective approach to bridge the gap between Internet of Things devices' constrained resources and DNNs' tremendous cost
- Analog RRAM buffer
  - due to the huge overhead of A/D conversions and digital accumulations
  - offers potential solutions to A/D conversion issues

# Research Objectives

- Our research aims to address:
  - the energy consumption in resource-constrained environments
  - the critical concerns over endurance
  - strictly provides an inference accuracy guarantee

# Research Method

- A co-optimizing strategy
  - combining both voltage regulation and bit-width compaction
  - in a layer-centric fashion
- A data mapping and wear-aware data swapping method
  - designate RRAM partition to DNN
  - control the write balance of whole RRAM arrays

# Research Results

- LayCO outperforms state-of-the-art designs in:
  - energy efficiency ( $27\times$  over TIMELY-like configuration)
  - lifetime prolongation ( $308\times$  over RAQ )
  - area reduction ( $6\times$  over RAQ )
  - strictly ensuring a target DNN accuracy (accuracy loss less than 1%)

# Research Conclusions

- Three key contributions on LayCO:
  - voltage regulating, bit-width tightening, and data mapping and swapping method
- Enlighten further research
  - Low-voltage approximate memory for error-tolerant deep learning workloads
